# Supplementary material for: Haematological malignancies in patients with psoriatic arthritis overall and treated with TNF inhibitors: a Nordic cohort study
Source: PubMed Central journal article supplement — RMD Open. 2022 Dec 23;8(2):e002776. doi: 10.1136/rmdopen-2022-002776 (PMC9791468; doi:10.1136/rmdopen-2022-002776), 2022-12-23
Supplement: rmdopen-2022-002776supp001.pdf [file rmdopen-2022-002776supp001.pdf]

**Supplementary Table S1: Definitions, sources, and formats of reporting for exposure, covariates and outcomes.**

| Variable                                                | Reporting of variable                    | ICD10 or surgical procedure codes                                                                                                                                                                                                         | Registration period and data source used                                                                                                                                                                                                                                                                                                                                           |
|---------------------------------------------------------|------------------------------------------|-------------------------------------------------------------------------------------------------------------------------------------------------------------------------------------------------------------------------------------------|------------------------------------------------------------------------------------------------------------------------------------------------------------------------------------------------------------------------------------------------------------------------------------------------------------------------------------------------------------------------------------|
| <b>Definition of PsA diagnosis</b>                      | N/A                                      | L405, M070, M071, M072, M073                                                                                                                                                                                                              | As registered in the clinical rheumatology registers for the TNFi-treated and for the bDMARD-naïve PsA (disease comparator 1) or requiring ≥2 visits with PsA as registered in the patient registers at an internal medicine or rheumatology department in Sweden or Denmark (comparator 2) from 2006 up until 2019 (Sweden, Norway) or 2017 (Finland, Iceland) or 2016 (Denmark). |
| <b>Demographics and disease related characteristics</b> |                                          |                                                                                                                                                                                                                                           |                                                                                                                                                                                                                                                                                                                                                                                    |
| Male, n (%)                                             | n (%)                                    | N/A                                                                                                                                                                                                                                       | Recorded at start of follow-up (window: 8 weeks before until 7 days after) for all study participants in the clinical rheumatology registers (all countries) or/and the prescribed drug register (Sweden and Denmark for the sensitivity analysis).<br><br>The value closest to the start of follow-up was chosen.                                                                 |
| Age (years)                                             | median (SD)                              | N/A                                                                                                                                                                                                                                       |                                                                                                                                                                                                                                                                                                                                                                                    |
| Tender joint count (0-28)                               | median (IQR)<br>[missing]                | N/A                                                                                                                                                                                                                                       |                                                                                                                                                                                                                                                                                                                                                                                    |
| Swollen joint count (0-28)                              | median (IQR)<br>[missing]                | N/A                                                                                                                                                                                                                                       |                                                                                                                                                                                                                                                                                                                                                                                    |
| HAQ score (0-3)                                         | median (IQR)<br>[missing]                | N/A                                                                                                                                                                                                                                       |                                                                                                                                                                                                                                                                                                                                                                                    |
| DAS28-CRP (0-10)                                        | median (IQR)<br>[missing]                | N/A                                                                                                                                                                                                                                       |                                                                                                                                                                                                                                                                                                                                                                                    |
| CRP (mg/liter)                                          | median (IQR)<br>[missing]                | N/A                                                                                                                                                                                                                                       |                                                                                                                                                                                                                                                                                                                                                                                    |
| Methotrexate and oral steroids                          | n (%)                                    | N/A                                                                                                                                                                                                                                       |                                                                                                                                                                                                                                                                                                                                                                                    |
| Dose oral steroids (mg):                                | median (IQR)                             | N/A                                                                                                                                                                                                                                       |                                                                                                                                                                                                                                                                                                                                                                                    |
| <b>Lifestyle factors</b>                                |                                          |                                                                                                                                                                                                                                           |                                                                                                                                                                                                                                                                                                                                                                                    |
| BMI (kg/m <sup>2</sup> )                                | median (IQR)<br>[missing]                | N/A                                                                                                                                                                                                                                       | Recorded in the clinical rheumatology registers within 1 year before start of follow-up. The value closest to the follow-up start date was chosen.                                                                                                                                                                                                                                 |
| Smoking status, n (%)                                   | Current, previous, never, missing, n (%) | N/A                                                                                                                                                                                                                                       |                                                                                                                                                                                                                                                                                                                                                                                    |
| <b>Comorbidity conditions</b>                           |                                          |                                                                                                                                                                                                                                           |                                                                                                                                                                                                                                                                                                                                                                                    |
| Cardiovascular disease <sup>a</sup>                     | n (%)                                    | I20-I25, I50, I60-I69                                                                                                                                                                                                                     | Recorded up to 10 years prior to start of follow-up in the patient registers of each country                                                                                                                                                                                                                                                                                       |
| COPD                                                    | n (%)                                    | J41-J44                                                                                                                                                                                                                                   |                                                                                                                                                                                                                                                                                                                                                                                    |
| Diabetes mellitus                                       | n (%)                                    | E10-E14                                                                                                                                                                                                                                   |                                                                                                                                                                                                                                                                                                                                                                                    |
| Hypertension                                            | n (%)                                    | I10-I13, I15                                                                                                                                                                                                                              |                                                                                                                                                                                                                                                                                                                                                                                    |
| Inflammatory bowel disease                              | n (%)                                    | K50-K51                                                                                                                                                                                                                                   |                                                                                                                                                                                                                                                                                                                                                                                    |
| Uveitis                                                 | n (%)                                    | H20, H221                                                                                                                                                                                                                                 |                                                                                                                                                                                                                                                                                                                                                                                    |
| Urethritis                                              | n (%)                                    | N341, N342, N370                                                                                                                                                                                                                          |                                                                                                                                                                                                                                                                                                                                                                                    |
| No. of hospitalizations                                 | median (IQR)                             |                                                                                                                                                                                                                                           |                                                                                                                                                                                                                                                                                                                                                                                    |
| Hip and/or knee Replacement                             | n (%)                                    | Surgical codes:<br>Sweden: NGB, 8423-8424, 8426, NFB, 8400-8415, 8419.<br>Denmark: NGB, 8280, 70042, 70043, 70143, 70142, NFB, 70032, 70033.<br>Finland: NGB 10-99, NFB 10-99, NFC 00-99 and NGC 00-99.<br>Norway, Iceland: Not available |                                                                                                                                                                                                                                                                                                                                                                                    |
| <b>ICD-10 codes for the haematological malignancies</b> |                                          |                                                                                                                                                                                                                                           |                                                                                                                                                                                                                                                                                                                                                                                    |
| All hematological malignancies                          | N/A                                      | C81-86, C88, C90-96, D45-46, D47.1, D47.3, D47.4 and D47.5                                                                                                                                                                                | Recorded after start of follow-up in the national cancer registers of each country                                                                                                                                                                                                                                                                                                 |

---

|                       |                                                     |
|-----------------------|-----------------------------------------------------|
| Lymphoid malignancies | C81-86, C88<br>C90-91                               |
| Myeloid malignancies  | C92-95<br>D45-D46, D47.1, D47.3, D47.4 and<br>D47.5 |

---

<sup>a</sup>Including cerebrovascular disease.

IQR, interquartile range; TNFi, tumor necrosis factor inhibitor; BMI, body mass index; VAS, visual analogue scale; HAQ, Health Assessment Questionnaire; DAS28, Disease Activity Score in 28 joints; CRP, C-reactive protein; COPD, chronic obstructive pulmonary disease.

**Supplementary Table S2** Incidence rates and Hazard Ratios (HR) of haematological malignancy overall in TNFi-treated versus bDMARD-naïve patients with PsA in Sweden and Denmark using an alternative PsA comparator definition<sup>1</sup>

|                                        | Sweden            |                               | Denmark              |                               |
|----------------------------------------|-------------------|-------------------------------|----------------------|-------------------------------|
|                                        | TNFi treated PsA  | bDMARD naïve PsA <sup>1</sup> | TNFi treated PsA     | bDMARD naïve PsA <sup>1</sup> |
| N. patients with PsA                   | 6505              | 2948                          | 2444                 | 3448                          |
| Person-years                           | 36950             | 12153                         | 12428                | 14176                         |
| N. haematological malignancies overall | 28                | 12                            | 7                    | 20                            |
| Crude incidence rates                  | 75.8 (52.3-109.8) | 98.7 (56.1-173.8)             | 56.3 (22.6 to 116.0) | 172.3 (96.4 to 284.2)         |
| Hazard ratio (95 % CI)                 |                   |                               |                      |                               |
| Crude                                  | 0.90 (0.46-1.79)  |                               | 0.54 (0.21 to 1.40)  |                               |
| Adjusted <sup>2</sup>                  | 0.84 (0.42-1.67)  |                               | 0.54 (0.21 to 1.40)  |                               |

<sup>1</sup> Alternative comparator group is defined as: bDMARD-naïve patients with PsA from the NPR switching or adding methotrexate or sulfasalazine during time of follow-up <sup>2</sup>Multivariate Cox regression with 95% Confidence Intervals (CI). Adjusted for sex and calendar period (2006-2010, 2011-end of study period) with age as time scale. The HR gives the ratio of the hazard for the TNFi-treated group with PsA to the alternative comparator group. The TNFi treated and not treated groups are also restricted to start time of follow-up the same starting year.

**Supplementary Figure S1** Pooled incidence rate ratios (IRRs)<sup>1</sup> of haematological malignancy overall and by lymphoid and myeloid types, in first ever TNFi-treated versus bDMARD-naïve patients with PsA and versus general population comparators excluding everyone with RA before start of follow up+ censoring those receiving a RA diagnosis according to national patient registers during follow-up<sup>2</sup>.

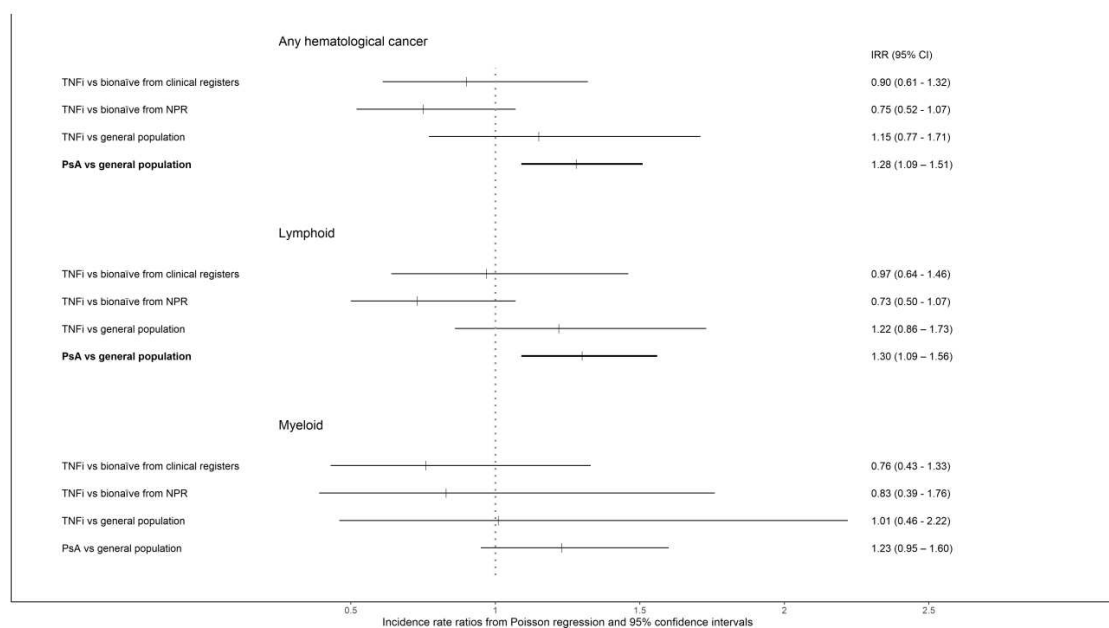

<sup>1</sup>Incidence rate ratio (IRR) and 95% Confidence Intervals (CI) with modified Poisson regression adjusted for age (categories 18- 55, 56-65, 66-70, >70 years), sex and calendar period (2006-2010, 2011- end of follow up) and country. <sup>2</sup>The exclusion of RA was only done for Sweden and Denmark since we did not have information on potential visits with a registered RA diagnosis the national patient register (NPR) in Finland, Iceland or Norway. One event in the bDMARD-naïve PsA group from the national patient registers and one event from the general comparator group 1 (i.e. the comparators to the TNFi group), as well as 6 events in the general comparator group 2 (i.e. the comparators to the all PsA group) had ICD10 code C96 in the cancer registry defined as "other and unspecified tumors in hematopoietic and lymphoid tissue". These are not included among the lymphoid or the myeloid malignancies. TNFi= Tumor Necrosis Factor inhibitor NPR = National patient register DK=Denmark. FI=Finland, ICE=Iceland, NO =Norway, SE=Sweden

**Supplementary Table S3** Hazard ratios with 95% confidence intervals (CI) for potential associations between baseline disease activity parameters and haematological, lymphoid, and myeloid malignancies, respectively, in Danish and Swedish patients with PsA from the clinical rheumatology registers.

| Parameter                                          | HR 95% CI crude or adjusted for age, sex, and calendar period | Denmark          | Sweden           | Denmark and Sweden combined |
|----------------------------------------------------|---------------------------------------------------------------|------------------|------------------|-----------------------------|
| DAS28-CRP (continuous)                             | Crude, haematological                                         | 0.91 (0.67-1.25) | 1.02 (0.80-1.31) | 0.98 (0.81-1.19)            |
|                                                    | Crude, lymphoid                                               | 0.99 (0.68-1.44) | 0.85 (0.62-1.17) | 0.91 (0.71-1.16)            |
|                                                    | Crude, myeloid                                                | 0.77 (0.44-1.36) | 1.43 (0.93-2.18) | 1.14 (0.81-1.60)            |
|                                                    | Adjusted, haematological                                      | 0.97 (0.72-1.31) | 1.01 (0.79-1.29) | 0.99 (0.82-1.20)            |
|                                                    | Adjusted, lymphoid                                            | 1.06 (0.74-1.5)  | 0.84 (0.62-1.15) | 0.93 (0.74-1.17)            |
|                                                    | Adjusted, myeloid                                             | 0.82 (0.46-1.44) | 1.41 (0.93-2.12) | 1.16 (0.83-1.63)            |
| DAS28-CRP $\geq 3.2$ vs $< 3.2$                    | Crude, haematological                                         | 0.78 (0.34-1.77) | 0.93 (0.48-1.80) | 0.87 (0.52-1.45)            |
|                                                    | Crude, lymphoid                                               | 0.91 (0.33-2.52) | 0.94 (0.41-2.14) | 0.93 (0.49-1.76)            |
|                                                    | Crude, myeloid                                                | 0.58 (0.14-2.41) | 0.91 (0.30-2.74) | 0.77 (0.32-1.84)            |
|                                                    | Adjusted, haematological                                      | 0.91 (0.4-2.09)  | 0.97 (0.50-1.89) | 0.95 (0.57-1.59)            |
|                                                    | Adjusted, lymphoid                                            | 1.11 (0.39-3.11) | 0.97 (0.42-2.23) | 1.02 (0.53-1.95)            |
|                                                    | Adjusted, myeloid                                             | 0.66 (0.15-2.79) | 0.97 (0.32-2.96) | 0.84 (0.35-2.03)            |
| Swollen joint count (of 28). $\geq 1$ vs 0.        | Crude, haematological                                         | 0.92 (0.42-1.99) | 0.71 (0.38-1.32) | 0.78 (0.40-1.27)            |
|                                                    | Crude, lymphoid                                               | 0.95 (0.37-2.42) | 0.61 (0.28-1.31) | 0.72 (0.40-1.32)            |
|                                                    | Crude, myeloid                                                | 0.85 (0.21-3.39) | 0.94 (0.32-2.76) | 0.90 (0.39-2.12)            |
|                                                    | Adjusted, haematological                                      | 0.93 (0.43-2.02) | 0.68 (0.36-1.28) | 0.77 (0.47-1.26)            |
|                                                    | Adjusted, lymphoid                                            | 0.99 (0.39-2.53) | 0.58 (0.27-1.25) | 0.72 (0.40-1.30)            |
|                                                    | Adjusted, myeloid                                             | 0.85 (0.21-3.42) | 0.94 (0.32-2.79) | 0.91 (0.39-2.13)            |
| Swollen joint count (of 28). $\geq 3$ vs $< 3$ .   | Crude, haematological                                         | 0.85 (0.35-2.02) | 1.15 (0.62-2.11) | 1.03 (0.63-1.71)            |
|                                                    | Crude, lymphoid                                               | 1.08 (0.4-2.88)  | 0.70 (0.31-1.56) | 0.83 (0.44-1.55)            |
|                                                    | Crude, myeloid                                                | 0.39 (0.05-3.15) | 2.77 (0.94-8.18) | 1.83 (0.70-4.77)            |
|                                                    | Adjusted, haematological                                      | 0.77 (0.32-1.85) | 1.04 (0.56-1.93) | 0.94 (0.57-1.56)            |
|                                                    | Adjusted, lymphoid                                            | 0.97 (0.36-2.61) | 0.61 (0.27-1.38) | 0.74 (0.39-1.38)            |
|                                                    | Adjusted, myeloid                                             | 0.38 (0.05-3.13) | 2.65 (0.89-7.87) | 1.75 (0.67-4.59)            |
| C-reactive protein $\geq 10$ mg/mL vs $< 10$ mg/mL | Crude, haematological                                         | 0.82 (0.36-1.86) | 1.29 (0.70-2.38) | 1.10 (0.67-1.79)            |
|                                                    | Crude, lymphoid                                               | 0.89 (0.34-2.36) | 0.82 (0.36-1.88) | 0.85 (0.45-1.60)            |
|                                                    | Crude, myeloid                                                | 0.66 (0.14-3.18) | 2.63 (0.98-7.08) | 1.78 (0.77-4.10)            |
|                                                    | Adjusted, haematological                                      | 0.83 (0.36-1.89) | 1.20 (0.65-2.22) | 1.05 (0.64-1.72)            |
|                                                    | Adjusted, lymphoid                                            | 0.88 (0.33-2.34) | 0.75 (0.33-1.70) | 0.80 (0.43-1.50)            |
|                                                    | Adjusted, myeloid                                             | 0.71 (0.15-3.43) | 2.59 (0.96-7.02) | 1.79 (0.77-4.15)            |
| HAQ-DI $\geq 1$ vs $< 1$                           | Crude, haematological                                         | 1.51 (0.6-3.83)  | 1.71 (0.88-3.32) | 1.64 (0.96-2.82)            |
|                                                    | Crude, lymphoid                                               | 2.26 (0.69-7.4)  | 1.95 (0.84-4.53) | 2.05 (1.03-4.07)            |
|                                                    | Crude, myeloid                                                | 0.76 (0.15-3.93) | 1.36 (0.45-4.05) | 1.13 (0.46-2.82)            |
|                                                    | Adjusted, haematological                                      | 1.51 (0.58-3.93) | 1.54 (0.77-3.07) | 1.53 (0.87-2.68)            |
|                                                    | Adjusted, lymphoid                                            | 2.8 (0.83-9.46)  | 1.75 (0.73-4.18) | 2.05 (1.01-4.17)            |
|                                                    | Adjusted, myeloid                                             | 0.58 (0.11-3.03) | 1.25 (0.40-3.86) | 0.97 (0.38-2.48)            |

**Supplementary Table S4** Disease activity and functional status at start of follow up in relation to occurrence (yes/no) of haematological cancer in TNFi-treated versus bDMARD-naïve patients with PsA from the clinical rheumatology registers in Sweden and Denmark combined.

|                                                                                     | Among PsA patients<br>with haematological malignancy | Among PsA patients<br>without haematological malignancy |
|-------------------------------------------------------------------------------------|------------------------------------------------------|---------------------------------------------------------|
| <b>Total number</b>                                                                 | 35 (TNFi-treated) and<br>59 (bDMARD-naïve)           | 8899 (TNFi-treated) and<br>16280 (bDMARD-naïve)         |
| <b>Disease activity measures and functional status at start of follow-up</b>        | N (%)<br>[N missing (%missing)]                      | N (%)<br>[N missing (%missing)]                         |
| TNFi exposed                                                                        | 19 (82.6 %)<br>[12 (34.3%)]                          | 4218 (76.0 %)<br>[3346 (37.6%)]                         |
| bDMARD-naïve                                                                        | 17 (43.6%)<br>[20 (33.9%)]                           | 5375 (50.2 %)<br>[5564 (46.6%)]                         |
| <b>Swollen joint count ≥ 1:</b>                                                     |                                                      |                                                         |
| TNFi exposed                                                                        | 18 (75.0%)<br>[11 (31.3%)]                           | 4329 (72.1%)<br>[2892 (32.5%)]                          |
| bDMARD-naïve                                                                        | 21 (47.8%)<br>[15 (25.4%)]                           | 6940 (55.5%)<br>[3773 (27.8%)]                          |
| <b>Tender joint count ≥ 3:</b>                                                      |                                                      |                                                         |
| TNFi exposed                                                                        | 15 (62.5%)<br>[11 (31.3%)]                           | 2688 (44.7%)<br>[2892 (32.5%)]                          |
| bDMARD-naïve                                                                        | 11 (25%)<br>[15 (25.4%)]                             | 3489 (27.9%)<br>[3773 (26.9%)]                          |
| <b>CRP (mg/liter) ≥ 10</b>                                                          |                                                      |                                                         |
| TNFi exposed                                                                        | 11 (42.3%)<br>[9 (25.7%)]                            | 2257 (35.0%)<br>[2456 (27.6%)]                          |
| bDMARD-naïve                                                                        | 14 (30.4%)<br>[13 (22.0%)]                           | 3506 (27.9%)<br>[3725 (27.0%)]                          |
| <b>HAQ ≥ 1</b>                                                                      |                                                      |                                                         |
| TNFi exposed                                                                        | 10 (55.6%)<br>[17 (48.6%)]                           | 2508 (47.1%)<br>[3572 (40.1%)]                          |
| bDMARD-naïve                                                                        | 16 (45.7%)<br>[24 (40.7%)]                           | 3497 (31.1%)<br>[5053 (34.5%)]                          |
| <b>Any indication of inflammation defined as swollen joint count ≥1 and CRP ≥10</b> |                                                      |                                                         |
| TNFi exposed                                                                        | 9 (45.0%)<br>[15 (42.3%)]                            | 1649 (32.1%)<br>[3760 (42.3%)]                          |
| bDMARD-naïve                                                                        | 8 (24.2%)<br>[26 (44.1%)]                            | 2294 (25.1%)<br>[7143 (43.9%)]                          |

DAS28= Disease Activity Score in 28 joints, CRP=C-reactive protein, HAQ=Health Assessment Questionnaire

**Supplementary Table S5.** Country-specific and pooled hazard ratios for haematological cancer in Cox proportional hazard models when adjusting for baseline presence of comorbidities<sup>1</sup> on Danish and Swedish data.

|                                           | Denmark             | Sweden              | Pooled              |
|-------------------------------------------|---------------------|---------------------|---------------------|
| TNFi treated vs CRR bDMARD naïve patients | 0.68 (0.18 to 2.57) | 1.33 (0.79 to 2.22) | 1.21 (0.76 to 1.96) |
| TNFi treated vs NPR bDMARD naïve patients | 0.55 (0.15 to 2.00) | 0.91 (0.60 to 1.37) | 0.87 (0.58 to 1.28) |
| TNFi treated vs matched controls          | 2.03 (0.77 to 5.35) | 1.26 (0.83 to 1.90) | 1.35 (0.92 to 1.98) |
| PsA patients vs matched controls          | 1.34 (0.92 to 1.97) | 1.28 (1.08 to 1.52) | 1.29 (1.11 to 1.51) |

<sup>1</sup>Adjusted for baseline presence (yes/no) of chronic obstructive pulmonary disease, cardiovascular disease, diabetes mellitus, and arterial hypertension as separate covariates.

**Supplementary Table S6** Number, person-years and crude incidence rates/100 000 person-years of hematological malignancies with respect to type of bDMARD in an *a)* ever exposure model and *b)* a most recent exposure model for Sweden and Denmark combined.

|                                                                     | Adalimumab           | Certolizumab<br>pegol | Etanercept           | Golimumab            | Infliximab           |
|---------------------------------------------------------------------|----------------------|-----------------------|----------------------|----------------------|----------------------|
| <b>Model A ever received agent</b>                                  |                      |                       |                      |                      |                      |
| Number of malignancies/<br>number of treated patients               | 16 / 4302            | 4 / 910               | 13 / 4737            | 4 / 1265             | 11 / 2231            |
| Person-years                                                        | 23 459               | 3384                  | 24 262               | 6467                 | 12 651               |
| Crude incidence n/100 000 person-years,<br>95% CI                   | 68.2<br>(39.0-110.8) | 118.2<br>(32.2-302.6) | 53.6<br>(28.5-91.6)  | 61.9<br>(16.9-158.4) | 86.9<br>(43.4-155.6) |
| <b>Model B most recent agent</b>                                    |                      |                       |                      |                      |                      |
| Number of malignancies<br>/numbers of treated patients <sup>1</sup> | 12 / 4302            | <3 / 910              | 10 / 4737            | <3 / 1265            | 5 / 2231             |
| Person-years (pyrs)                                                 | 15 422               | 1965                  | 16 241               | 4015                 | 6878                 |
| Crude incidence n/100 000 person-years,<br>95% CI                   | 77.8<br>(40.2-135.9) | NA                    | 61.6<br>(29.5-113.2) | NA                   | 72.7<br>(23.6-169.6) |

Models applied:

Model A, ever exposure: Follow-up from start of any bDMARD agent until end of follow-up regardless of starting a second biological and/or discontinuation.

Model B, most recent drug: Follow-up from start of any bDMARD agent until start of a subsequent bDMARD agent ignoring any discontinuation date of the previous bDMARD. CI=confidence intervals. If the number of events is <3, only the person years are shown due to GDPR regulations.
